# Supplementary material
Source: publisher figshare collection journal article supplement (https://sage.figshare.com/ndownloader/files/12500279)
Supplement: Supplementary file 1 [file 12500279]

## Supplemental Material

### Design of First-Order 121.6 nm Minus Filters

Xiaodong Wang<sup>\*1</sup>, Bo Chen<sup>1</sup>, Tonglin Huo<sup>2</sup>, Hongjun Zhou<sup>2</sup>

1. State Key Laboratory of Applied Optics, Changchun Institute of Optics, Fine Mechanics and Physics, Chinese Academy of Sciences, Changchun 130033, China

2. National Synchrotron Radiation Laboratory, University of Science and Technology of China, Hefei 230026, China

Corresponding author email: wangxiaodong@ciomp.ac.cn

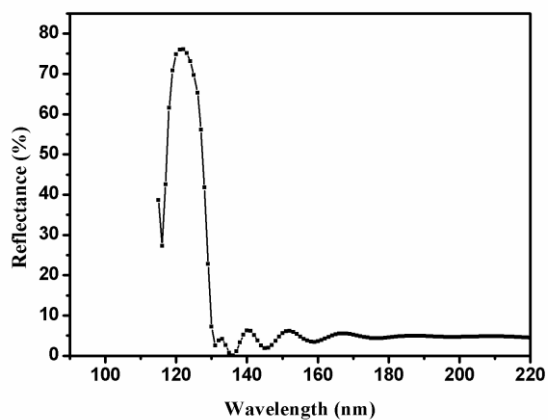

Figure S1. Theoretical reflectance curve of periodic multilayer of sub/(0.7H0.6L0.7H)<sup>11</sup>/air, and the incident angle is 10°.

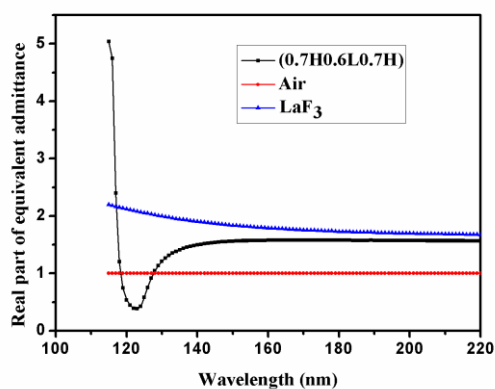

Figure S2. Real part of equivalent admittance of periodic multilayer (0.7H0.6L0.7H), and the incidence angle is 10°.

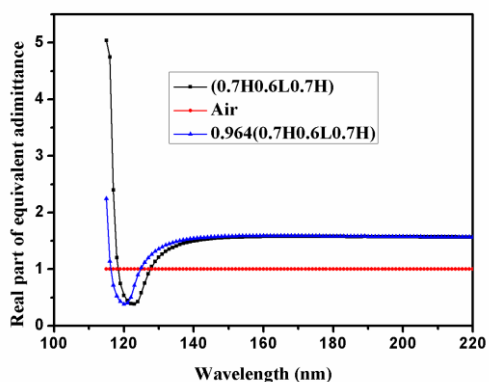

Figure S3. Real part of equivalent admittance of multilayer 0.964(0.7H0.6L0.7H), the incidence angle is  $10^\circ$ .

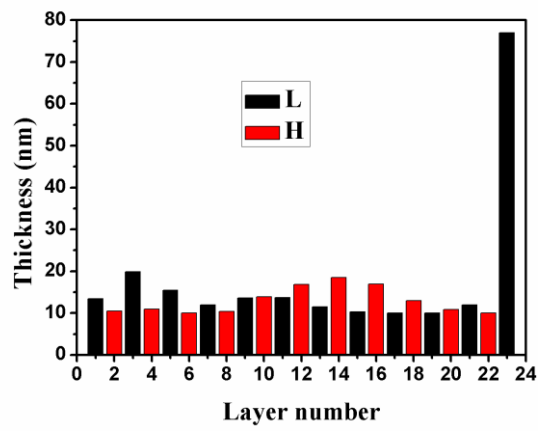

Figure S4. Final design result of 121.6 nm minus filter.

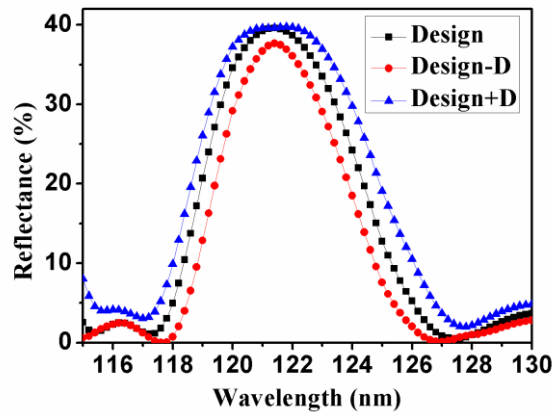

Figure S5. Error analysis result of final design.
